# Supplementary material
Source: MDPI journal article supplement (https://www.mdpi.com/1424-8247/16/7/1022)
Supplement: s1 [file s1]

## Supplementary Material

# Cyclodextrin's Effect on Permeability and Partition of Nortriptyline Hydrochloride

Tatyana Volkova \*, Olga Simonova and German Perlovich

G.A. Krestov Institute of Solution Chemistry RAS, 153045 Ivanovo, Russia; [ors@isc-ras.ru](mailto:ors@isc-ras.ru) (O.S.); [glp@isc-ras.ru](mailto:glp@isc-ras.ru) (G.P.)

\* Correspondence: [vtv@isc-ras.ru](mailto:vtv@isc-ras.ru); Tel.: +7-(4932)351545

### Table of Contents

|           |                                                                                                                                                                                                                                                                        |   |
|-----------|------------------------------------------------------------------------------------------------------------------------------------------------------------------------------------------------------------------------------------------------------------------------|---|
| Figure S1 | Particles distribution plots.                                                                                                                                                                                                                                          | 2 |
| Table S1  | Molar concentrations ( $C_2$ ) of NTT•HCl in the organic and aqueous phases of the studied distribution systems at 37 °C.                                                                                                                                              | 3 |
| Table S2  | Donor solution concentrations ( $C$ ), flux ( $J$ ), and permeability coefficients ( $P_{app}$ ) of NTT•HCl through the PermePad barrier (PP) and cellulose membrane (RC) at 37 °C, pH 6.8 in the donor compartment; the standard deviations are given in parenthesis. | 3 |

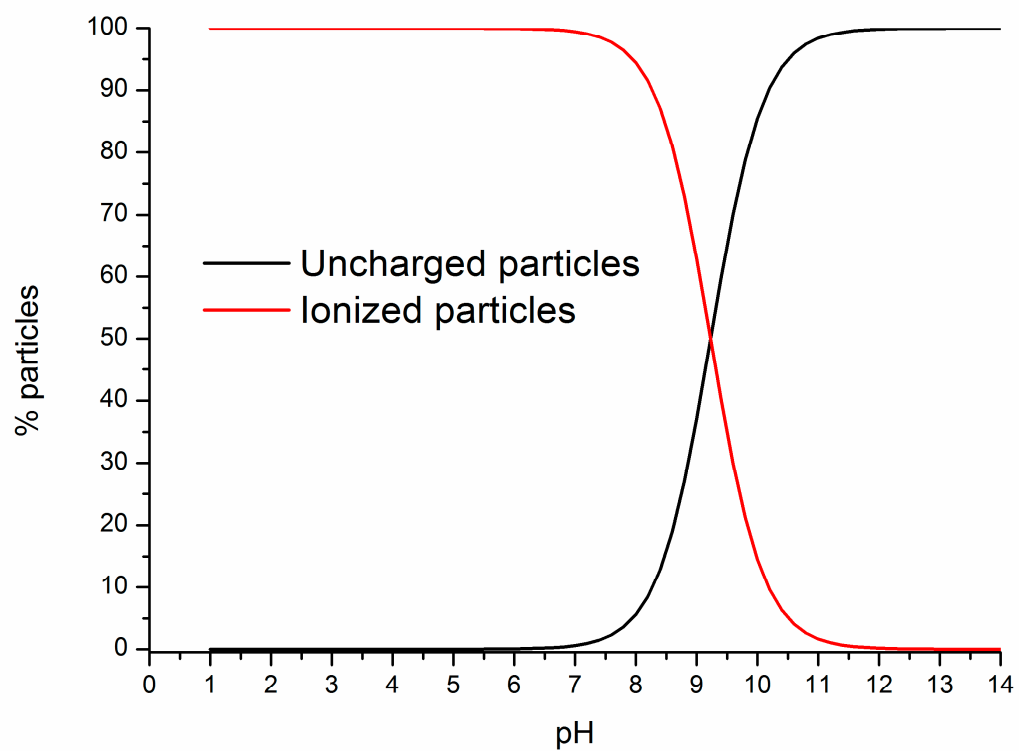

**Figure S1.** Particles distribution plots.

**Table S1.** Molar concentrations ( $C_2$ ) of NTT•HCl in the organic and aqueous phases of the studied distribution systems at 37 °C.

| System                               | $C_2^{Org / buf}$     | $C_2^{buf / Org}$     | $C_2^{Org / buf} \cdot 10^4$ | $C_2^{buf / Org} \cdot 10^3$ |
|--------------------------------------|-----------------------|-----------------------|------------------------------|------------------------------|
|                                      | pH 6.8                |                       | pH 4.0                       |                              |
| <sup>1</sup> 1-octanol/buffer system |                       |                       |                              |                              |
| Without CD                           | 1.82·10 <sup>-3</sup> | 3.29·10 <sup>-4</sup> | 1.58·10 <sup>-3</sup>        | 3.79·10 <sup>-4</sup>        |
| 0.0115 M HP-β-CD                     | 1.38·10 <sup>-3</sup> | 5.29·10 <sup>-4</sup> | 4.99·10 <sup>-4</sup>        | 1.67·10 <sup>-3</sup>        |
| 0.025 M HP-β-CD                      | 1.27·10 <sup>-3</sup> | 6.38·10 <sup>-4</sup> | 2.89·10 <sup>-4</sup>        | 1.88·10 <sup>-3</sup>        |
| 0.035 M HP-β-CD                      | 1.11·10 <sup>-3</sup> | 7.90·10 <sup>-4</sup> | 1.99·10 <sup>-4</sup>        | 1.97·10 <sup>-3</sup>        |
| 0.0115 M SBE-β-CD                    | 1.01·10 <sup>-3</sup> | 7.00·10 <sup>-4</sup> | 3.63·10 <sup>-4</sup>        | 1.78·10 <sup>-3</sup>        |
| 0.025 M SBE-β-CD                     | 4.57·10 <sup>-4</sup> | 1.25·10 <sup>-3</sup> | 1.70·10 <sup>-4</sup>        | 1.97·10 <sup>-3</sup>        |
| 0.035 M SBE-β-CD                     | 3.68·10 <sup>-4</sup> | 1.62·10 <sup>-3</sup> | 2.65·10 <sup>-5</sup>        | 2.12·10 <sup>-3</sup>        |
| <sup>2</sup> n-hexane/buffer system  |                       |                       |                              |                              |
| Without CD                           | 1.11·10 <sup>-4</sup> | 1.95·10 <sup>-3</sup> | 6.58·10 <sup>-5</sup>        | 1.86·10 <sup>-3</sup>        |
| 0.0115 M HP-β-CD                     | 1.13·10 <sup>-4</sup> | 2.16·10 <sup>-3</sup> | 5.46·10 <sup>-5</sup>        | 1.97·10 <sup>-3</sup>        |
| 0.0115 M SBE-β-CD                    | 9.86·10 <sup>-5</sup> | 1.92·10 <sup>-3</sup> | 3.59·10 <sup>-5</sup>        | 1.80·10 <sup>-3</sup>        |

<sup>1</sup>V(oct):V(buf)= 3:3;

<sup>2</sup>V(hex):V(buf)= 12:2.

The standard uncertainties are  $u(t)=0.2$  °C. The relative standard uncertainties are  $u_r(C_2^{oct/buf})$ ;  $u_r(C_2^{buf/oct})$ ;  $u_r(C_2^{hex/buf})$ ; and  $u_r(C_2^{buf/hex})=0.04$ .

**Table S2.** Donor solution concentrations (C), flux (J), and permeability coefficients ( $P_{app}$ ) of NTT•HCl through the PermePad barrier (PP) and cellulose membrane (RC) at 37 °C, pH 6.8 in the donor compartment; the standard deviations are given in parenthesis.

| System   | $C \cdot 10^3$ (M) | $J$ ( $\mu\text{M} \cdot \text{cm}^{-2} \cdot \text{s}^{-1}$ ) | $P_{\text{app}}$ ( $\text{cm} \cdot \text{s}^{-1}$ ) | $C \cdot 10^3$ (M) | $J$ ( $\mu\text{M} \cdot \text{cm}^{-2} \cdot \text{s}^{-1}$ ) | $P_{\text{app}}$ ( $\text{cm} \cdot \text{s}^{-1}$ ) |
|----------|--------------------|----------------------------------------------------------------|------------------------------------------------------|--------------------|----------------------------------------------------------------|------------------------------------------------------|
| PP       |                    |                                                                | RC                                                   |                    |                                                                |                                                      |
| pH 6.8   |                    |                                                                |                                                      |                    |                                                                |                                                      |
| Buffer   | 1.42               | $3.46 \cdot 10^5$                                              | $2.44(0.07) \cdot 10^{-5}$                           | 2.11               | $8.22 \cdot 10^{-5}$                                           | $3.90(0.11) \cdot 10^{-5}$                           |
| HP-β-CD  |                    |                                                                |                                                      |                    |                                                                |                                                      |
| 0.0115 M | 2.20               | $2.69 \cdot 10^{-6}$                                           | $1.22(0.03) \cdot 10^{-6}$                           | 1.34               | $2.03 \cdot 10^5$                                              | $1.52(0.04) \cdot 10^{-5}$                           |
| 0.025 M  | 2.20               | $2.58 \cdot 10^{-6}$                                           | $1.17(0.03) \cdot 10^{-6}$                           | 1.66               | $2.06 \cdot 10^5$                                              | $1.25(0.03) \cdot 10^{-5}$                           |
| 0.035 M  | 2.23               | $9.39 \cdot 10^{-7}$                                           | $4.21(0.05) \cdot 10^{-7}$                           | 1.34               | $1.47 \cdot 10^5$                                              | $1.10(0.03) \cdot 10^{-5}$                           |
| SBE-β-CD |                    |                                                                |                                                      |                    |                                                                |                                                      |
| 0.0115 M | 2.28               | $1.48 \cdot 10^{-6}$                                           | $6.50(0.15) \cdot 10^{-7}$                           | 2.27               | $1.31 \cdot 10^5$                                              | $5.77(0.20) \cdot 10^{-6}$                           |
| 0.025 M  | 2.22               | $9.06 \cdot 10^{-7}$                                           | $4.09(0.08) \cdot 10^{-7}$                           | 1.68               | $8.43 \cdot 10^{-6}$                                           | $5.00(0.14) \cdot 10^{-6}$                           |
| 0.035 M  | 2.36               | $7.20 \cdot 10^{-7}$                                           | $3.05(0.07) \cdot 10^{-7}$                           | 2.36               | $1.03 \cdot 10^{-5}$                                           | $4.36(0.09) \cdot 10^{-6}$                           |
